# Supplementary material for: Catalytic hydrodeoxygenation of neat levulinic acid into 2-methyltetrahydrofuran using a cobalt phosphine complex and Sc(OTf)3co-catalytic system
Source: Royal Society of Chemistry journal article supplement (doi:10.1039/d2gc04912k), 2023-01-01
Supplement: d2gc04912k1.pdf [file d2gc04912k1.pdf]

**Electronic Supplementary Information for**  
**Catalytic hydrodeoxygenation of neat levulinic acid into**  
**2-methyltetrahydrofuran using cobalt phosphine complex**  
**and Sc(OTf)<sub>3</sub> co-catalytic system**

Lijin Gan and Jin Deng

*CAS Key Laboratory of Urban Pollutant Conversion, Anhui Province Key Laboratory of Biomass Clean Energy, Department of Applied Chemistry, University of Science and Technology of China, Hefei, Anhui 230026, China.*

**Corresponding Author:**  
*dengjin@ustc.edu.cn.*

Table of Contents

1. Literature overview
2. Figures of the experimental section
3. Research on the reaction pathway
4. Hydrodeoxygenation of fructose-derived LA
5. References

# 1. Literature overview

**Table S1** Conversion of GVL into 2-MeTHF

| Entry                              | Catalyst                                                        | Additive                        | Reaction conditions  |        |       | Solvent                | H source       | Conv.(%) | 2-MeTHF yield (%) | STY <sup>a</sup> (mol/(L*h)) | Ref. |
|------------------------------------|-----------------------------------------------------------------|---------------------------------|----------------------|--------|-------|------------------------|----------------|----------|-------------------|------------------------------|------|
|                                    |                                                                 |                                 | H <sub>2</sub> (MPa) | T (°C) | t (h) |                        |                |          |                   |                              |      |
| <b>Noble metal-based catalysts</b> |                                                                 |                                 |                      |        |       |                        |                |          |                   |                              |      |
| 1                                  | Ru(acac) <sub>3</sub> -PBu <sub>3</sub> (S/C = 420)             | NH <sub>4</sub> PF <sub>6</sub> | 8.3                  | 200    | 46    | Solvent free (100 wt%) | H <sub>2</sub> | -        | -                 | -                            | 1    |
| 2                                  | Ru(acac) <sub>3</sub> -triphos (S/C = 1000)                     | aIL                             | 10                   | 160    | 18    | Solvent free (100 wt%) | H <sub>2</sub> | -        | 95                | 0.528                        | 2    |
| 3                                  | [(TriPhos)Ru(CO)(H) <sub>2</sub> ] (S/C = 1000)                 | aIL                             | 10                   | 160    | 18    | Solvent free (100 wt%) | H <sub>2</sub> | -        | 96                | 0.533                        | 2    |
| 4                                  | 5%Ru/C (S/C = 427)                                              | -                               | 10                   | 190    | 24    | Solvent free (100 wt%) | H <sub>2</sub> | >99      | 43                | 0.179                        | 3    |
| 5                                  | [Cp*Ir(bpy-OMe)OH <sub>2</sub> ][OTf] <sub>2</sub> (S/C = 5194) | Sc(OTf) <sub>3</sub>            | 3                    | 100    | 16    | Solvent free (100 wt%) | H <sub>2</sub> | -        | 4                 | 0.025                        | 4    |

### Non-noble metal-based catalysts

|    |                                                                 |                      |   |     |    |                                  |                                |      |      |        |              |
|----|-----------------------------------------------------------------|----------------------|---|-----|----|----------------------------------|--------------------------------|------|------|--------|--------------|
| 6  | 30 wt% Cu/ZrO <sub>2</sub> -OG (S/C = 10.6)                     | -                    | 6 | 240 | 6  | Ethanol<br>(6 wt%)               | H <sub>2</sub>                 | 98   | 91.1 | 0.0759 | 5            |
| 7  | Cu/Al <sub>2</sub> O <sub>3</sub> (S/C = 12.7)                  | -                    | 4 | 200 | 2  | 1,4-<br>dioxane<br>(1.9 wt%)     | H <sub>2</sub>                 | 91   | 73.7 | 0.0723 | 6            |
| 8  | Ni-Cu/Al <sub>2</sub> O <sub>3</sub>                            | -                    |   |     |    | 2-propanol                       | 2-propanol<br>+ H <sub>2</sub> | 44.1 | 30.3 | -      | 7            |
| 9  | Ni-Cu/Al <sub>2</sub> O <sub>3</sub>                            | -                    | 5 | 230 | 5  | 2-butanol                        | H <sub>2</sub>                 | 80   | 64   | 0.0558 | 8            |
| 10 | Ni <sub>2</sub> Cu <sub>1</sub> /Al <sub>2</sub> O <sub>3</sub> | -                    | 5 | 200 | 5  | 2-propanol                       | 2-propanol<br>+ H <sub>2</sub> | 100  | 88.1 | 0.0678 | 9            |
| 11 | Ni-MoOx/Al <sub>2</sub> O <sub>3</sub> -600 (S/C = 15.3)        | -                    | 4 | 200 | 4  | Mesitylene<br>(5.4 wt%)          | H <sub>2</sub>                 | 95   | 29.5 | 0.0351 | 10           |
| 12 | Co/ZrO <sub>2</sub> (S/C = 5.9)                                 | -                    | 4 | 230 | 2  | 1,4-<br>dioxane<br>(0.64<br>wt%) | H <sub>2</sub>                 | 97.0 | 72.2 | 0.0239 | 11           |
| 13 | Co(OAc) <sub>2</sub> -triphos (S/C = 100)                       | Sc(OTf) <sub>3</sub> | 5 | 150 | 24 | Solvent<br>free<br>(100 wt%)     | H <sub>2</sub>                 | 100  | 97.2 | 0.405  | This<br>work |

<sup>a</sup> STY: Space-time yield.

**Table S2** Conversion of LA into 2-MeTHF

| Entry                              | Catalyst                                                                                                               | Additive                            | Reaction conditions  |        |                            | Solvent                | H source       | Conv. (%) | 2-MeTHF yield <sup>a</sup> (%) | STY <sup>b</sup> (mol/(L*h)) | Ref. |
|------------------------------------|------------------------------------------------------------------------------------------------------------------------|-------------------------------------|----------------------|--------|----------------------------|------------------------|----------------|-----------|--------------------------------|------------------------------|------|
|                                    |                                                                                                                        |                                     | H <sub>2</sub> (MPa) | T (°C) | t (h)                      |                        |                |           |                                |                              |      |
| <b>Noble metal-based catalysts</b> |                                                                                                                        |                                     |                      |        |                            |                        |                |           |                                |                              |      |
| 1                                  | Ru(acac) <sub>3</sub> -triphos (S/C = 1000)                                                                            | aIL+NH <sub>4</sub> PF <sub>6</sub> | 10                   | 160    | 18                         | Solvent free (100 wt%) | H <sub>2</sub> | 100       | 92                             | 0.511                        | 12   |
| 2                                  | Ru(acac) <sub>3</sub> -triphos (S/C = 1000)                                                                            | Al(OTf) <sub>3</sub>                | 5.5                  | 140    | 30                         | THF (3.2 wt%)          | H <sub>2</sub> | 100       | 88                             | 7.15×10 <sup>-3</sup>        | 13   |
| 3                                  | RuH <sub>2</sub> (PPh <sub>3</sub> )-{N(CH <sub>2</sub> PPh <sub>2</sub> ) <sub>3</sub> -κ <sup>3</sup> P} (S/C = 200) | HN(Tf) <sub>2</sub>                 | 6.5                  | 150    | 25                         | THF (6 wt%)            | H <sub>2</sub> | 100       | 87                             | 0.0166                       | 14   |
| 4                                  | 2% Ru/1.07% FeSBA-15                                                                                                   | -                                   | 3                    | 250    | LHSV 1.5 h <sup>-1</sup>   | 1,4-dioxane (10 wt%)   | H <sub>2</sub> | 93.2      | 67                             | -                            | 15   |
| 5                                  | 5%Ru/GO                                                                                                                | -                                   | 2.5                  | 265    | WHSV 0.512 h <sup>-1</sup> | 1,4-dioxane (10 wt%)   | H <sub>2</sub> | 100       | 48                             | -                            | 16   |
| 6                                  | Pt-Mo/H-β (S/C = 50)                                                                                                   | -                                   | 5                    | 130    | 24                         | Water (3.7 wt%)        | H <sub>2</sub> | >99       | 86                             | 0.0116                       | 17   |
| 7                                  | 5% Pd/C (S/C = 21)                                                                                                     | Microwave                           | -                    | 150    | 0.5                        | Formic acid            | HCOOH          | 78        | 72                             | -                            | 18   |

### Non-noble metal-based catalysts

|    |                                                                         |                      |     |     |                               |                        |                           |     |         |                       |           |
|----|-------------------------------------------------------------------------|----------------------|-----|-----|-------------------------------|------------------------|---------------------------|-----|---------|-----------------------|-----------|
| 8  | Cu-MINT (S/C = 121)                                                     | Microwave            | -   | 150 | 0.5                           | Formic acid (11 wt%)   | HCOOH                     | >90 | 67.5    | -                     | 18        |
| 9  | 80 wt% Cu/SiO <sub>2</sub>                                              | -                    | 2.5 | 265 | WHSV<br>0.513 h <sup>-1</sup> | 1,4-dioxane (10 wt%)   | H <sub>2</sub>            | 100 | 64      | -                     | 19        |
| 10 | 35 wt% Cu/Al <sub>2</sub> O <sub>3</sub> (S/C = 16)                     | -                    | 7   | 250 | 24                            | 2-propanol (5 wt%)     | 2-propanol+H <sub>2</sub> | 100 | 75      | 0.0269                | 20        |
| 11 | Cu-Ni/Al <sub>2</sub> O <sub>3</sub> -ZrO <sub>2</sub> (9) (S/C = 25)   | -                    | 3   | 220 | 10                            | 2-butanol (7.6 wt%)    | H <sub>2</sub>            | 100 | 99.8    | 0.0538                | 21        |
| 12 | Co(BF <sub>4</sub> ) <sub>2</sub> ·6H <sub>2</sub> O-triphos (S/C = 10) | -                    | 8   | 100 | 22                            | THF (2 wt%)            | H <sub>2</sub>            | >99 | 14      | 9.40×10 <sup>-4</sup> | 22        |
| 13 | Mn(CO) <sub>5</sub> Br (S/C = 40)                                       | HCl                  | -   | 100 | 24                            | Toluene (3.2 wt%)      | PhSiH <sub>3</sub>        | 100 | 99 (95) | 9.89×10 <sup>-3</sup> | 23        |
| 14 | Co(OAc) <sub>2</sub> -triphos (S/C = 100)                               | Sc(OTf) <sub>3</sub> | 5   | 150 | 24                            | Solvent free (100 wt%) | H <sub>2</sub>            | 100 | 97.0    | 0.404                 | This work |

<sup>a</sup> Isolated yield is given in parentheses. <sup>b</sup> STY: Space-time yield.

## 2. Figures of the experimental section

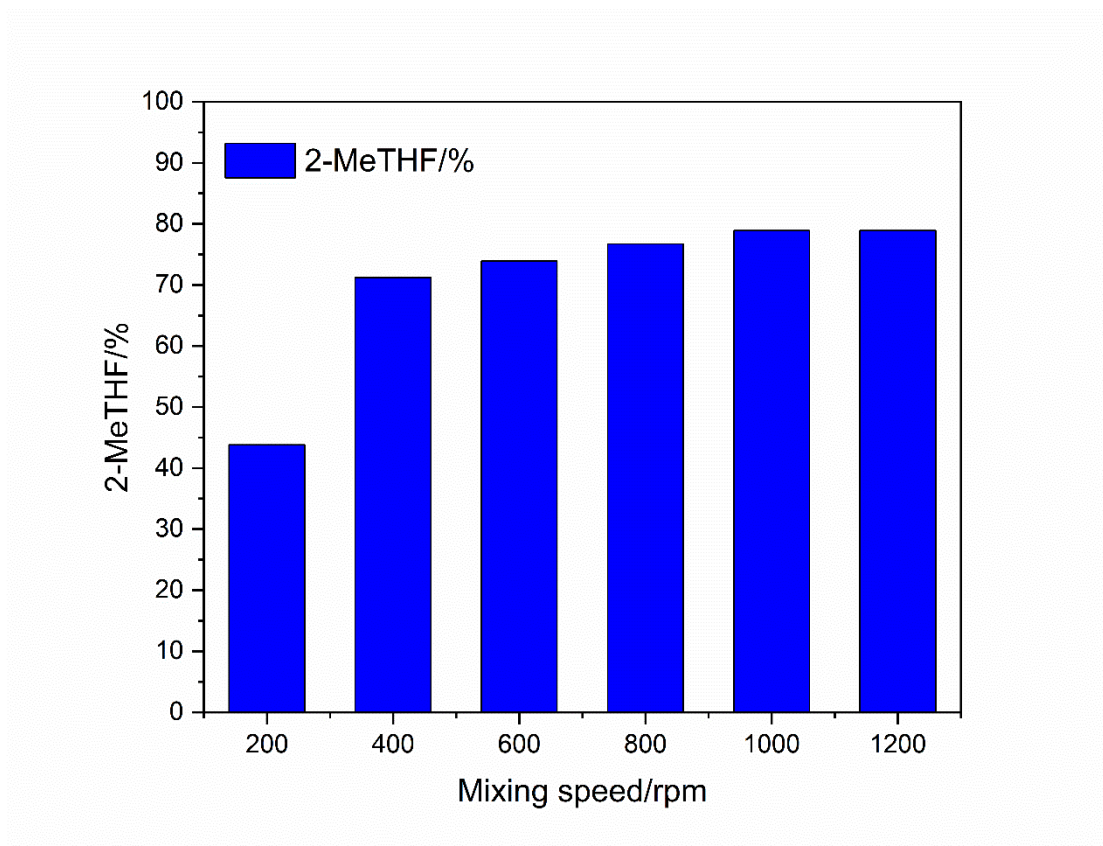

**Fig. S1** The effect of mixing speed on the reaction. Reaction conditions: 6 mmol neat GVL, 1 mol%  $\text{Co}(\text{OAc})_2/\text{triphos}$ , 2 mol%  $\text{Sc}(\text{OTf})_3$ , 150 °C, 5 MPa  $\text{H}_2$ , 12 h. Yields were determined by GC analysis.

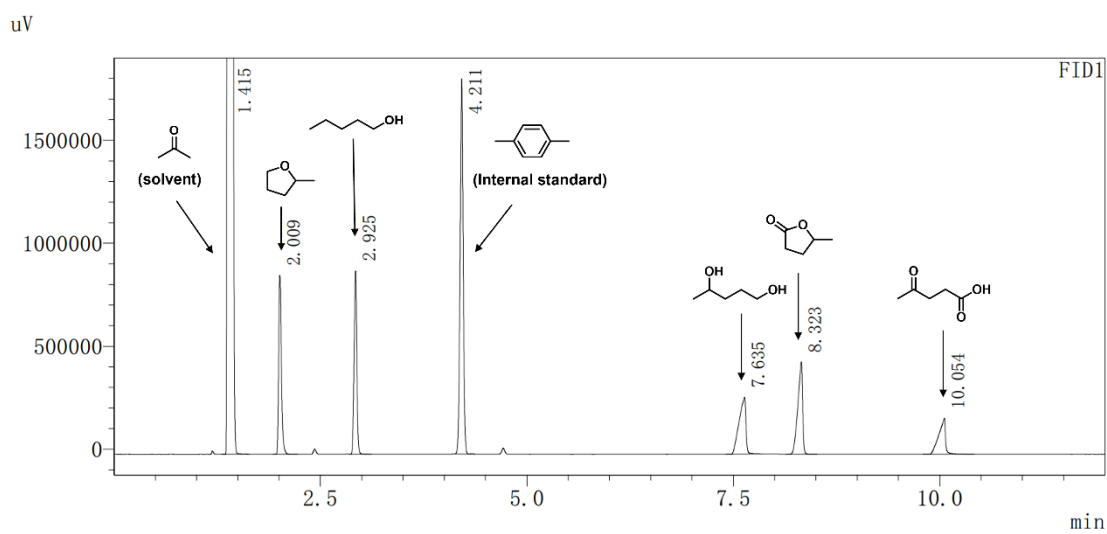

**Fig. S2** A representative GC chromatogram.

### 3. Research on the reaction pathway

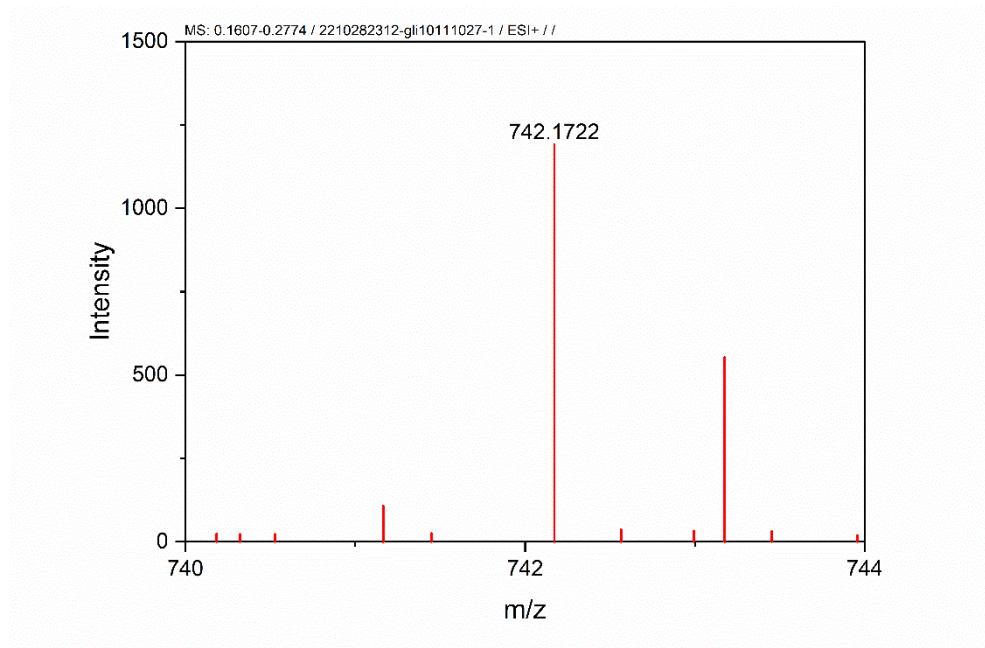

**Fig. S3** The ESI-MS of the  $\text{Co}(\text{OAc})_2/\text{triphos} = 1/1$  mixture.

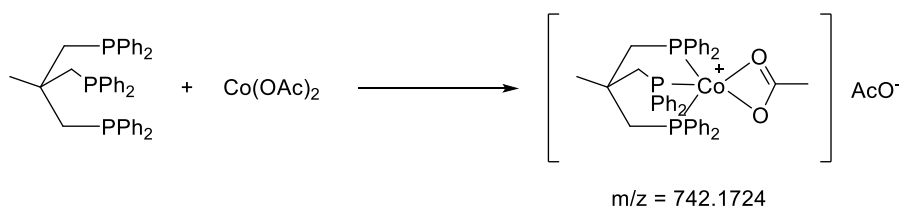

**Scheme S1** The coordination mode of  $\text{Co}(\text{OAc})_2$  with triphos.

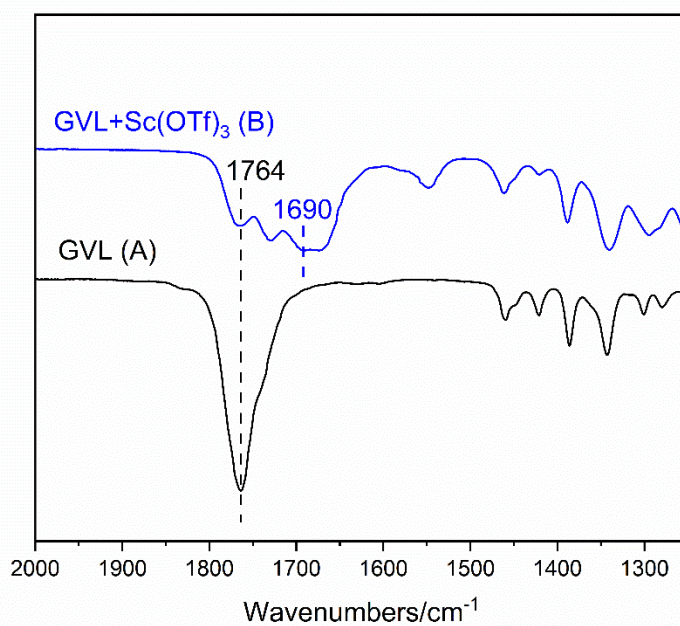

**Fig. S4** FTIR spectroscopy of GVL (A), and the mixture of GVL and  $\text{Sc}(\text{OTf})_3$  (B).

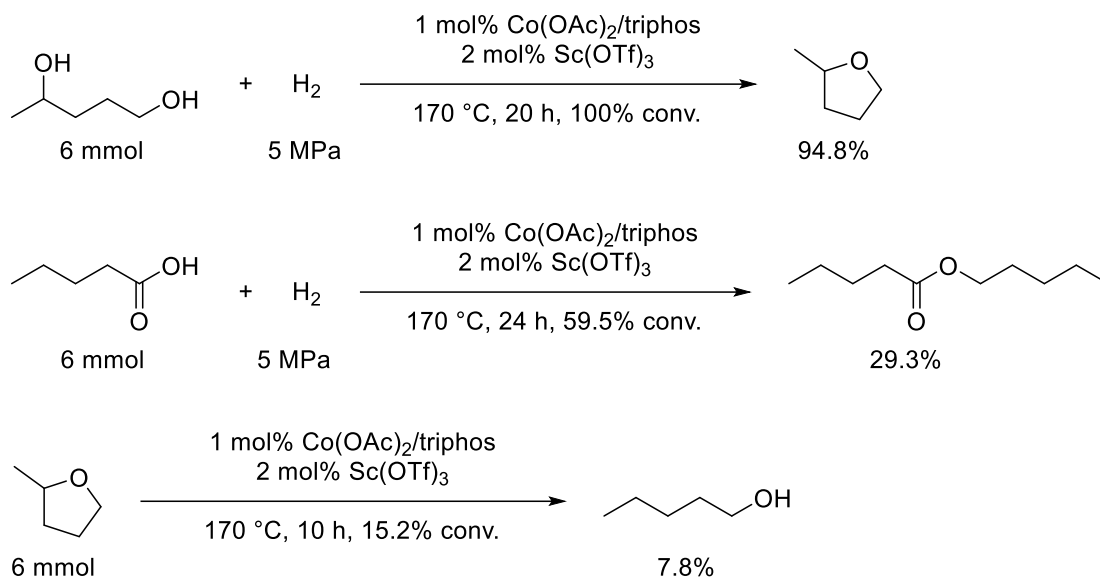

**Scheme S2** Experiments for the by-product 1-PeOH.

#### 4. Hydrodeoxygenation of fructose-derived LA

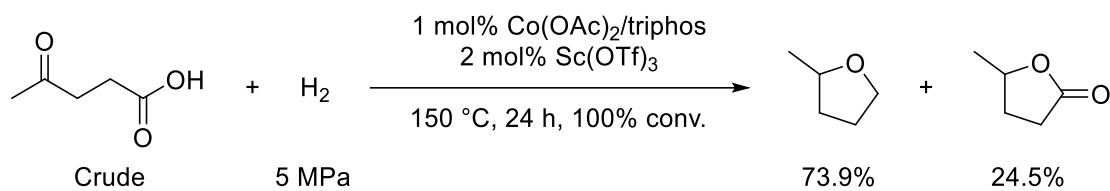

**Scheme S3** Hydrodeoxygenation of fructose-derived LA with 1 mol% Co(OAc)<sub>2</sub>.



## 5. References

1. H. Mehdi, V. Fábos, R. Tuba, A. Bodor, L. T. Mika and I. T. Horváth, *Top. Catal.*, 2008, **48**, 49-54.
2. F. M. Geilen, B. Engendahl, M. Holscher, J. Klankermayer and W. Leitner, *J. Am. Chem. Soc.*, 2011, **133**, 14349-14358.
3. M. G. Al-Shaal, A. Dzierbinski and R. Palkovits, *Green Chem.*, 2014, **16**, 1358-1364.
4. T. P. Brewster, N. M. Rezayee, Z. Culakova, M. S. Sanford and K. I. Goldberg, *ACS Catal.*, 2016, **6**, 3113-3117.
5. X. L. Du, Q. Y. Bi, Y. M. Liu, Y. Cao, H. Y. He and K. N. Fan, *Green Chem.*, 2012, **14**, 935-939.
6. Q. Liu, Z. Zhao, M. Arai, C. Zhang, K. Liu, R. Shi, P. Wu, Z. Wang, W. Lin, H. Cheng and F. Zhao, *Catal. Sci. Technol.*, 2020, **10**, 4412-4423.
7. I. Obregon, I. Gandarias, M. G. Al-Shaal, C. Mevissen, P. L. Arias and R. Palkovits, *ChemSusChem*, 2016, **9**, 2488-2495.
8. I. Obregon, I. Gandarias, A. Ocio, I. Garcia-Garcia, N. A. de Eulate and P. L. Arias, *Appl. Catal., B*, 2017, **210**, 328-341.
9. X. Wang, Z. Yu, L. Ye, M. Zhang, J. Xiong, R. Zhang, X. Li, N. Ji and X. Lu, *ChemCatChem*, 2021, **14**, DOI: 10.1002/cctc.202101441.
10. G. Zhang, W. Li, G. Fan, L. Yang and F. Li, *J. Catal.*, 2019, **379**, 100-111.
11. Y. L. Cen, S. H. Zhu, J. Guo, J. C. Chai, W. Y. Jiao, J. G. Wang and W. B. Fan, *RSC Advances*, 2018, **8**, 9152-9160.
12. F. M. Geilen, B. Engendahl, A. Harwardt, W. Marquardt, J. Klankermayer and W. Leitner, *Angew Chem Int Ed Engl*, 2010, **49**, 5510-5514.
13. Y. Li, C. Topf, X. Cui, K. Junge and M. Beller, *Angew. Chem., Int. Ed.*, 2015, **54**, 5196-5200.
14. A. Phanopoulos, A. J. P. White, N. J. Long and P. W. Miller, *ACS Catal.*, 2015, **5**, 2500-2512.
15. W. J. Li, L. M. Ye, J. Chen, X. P. Duan, H. Q. Lin and Y. Z. Yuan, *Catal. Today*, 2015, **251**, 53-59.
16. P. P. Upare, M. Lee, S. K. Lee, J. W. Yoon, J. Bae, D. W. Hwang, U. H. Lee, J. S. Chang and Y. K. Hwang, *Catal. Today*, 2016, **265**, 174-183.
17. T. Mizugaki, K. Togo, Z. Maeno, T. Mitsudome, K. Jitsukawa and K. Kaneda, *ACS Sustainable Chem. Eng.*, 2016, **4**, 682-685.
18. J. M. Bermudez, J. A. Menendez, A. A. Romero, E. Serrano, J. Garcia-Martinez and R. Luque, *Green Chem.*, 2013, **15**, 2786-2792.
19. P. P. Upare, J. M. Lee, Y. K. Hwang, D. W. Hwang, J. H. Lee, S. B. Halligudi, J. S. Hwang and J. S. Chang, *ChemSusChem*, 2011, **4**, 1749-1752.
20. I. Obregon, I. Gandarias, N. Miletic, A. Ocio and P. L. Arias, *ChemSusChem*, 2015, **8**, 3483-3488.
21. Z. Xie, B. Chen, H. Wu, M. Liu, H. Liu, J. Zhang, G. Yang and B. Han, *Green Chem.*, 2019, **21**, 606-613.
22. T. J. Korstanje, J. I. van der Vlugt, C. J. Elsevier and B. de Bruin, *Science*, 2015, **350**, 298-302.
23. D. A. Roa and J. J. Garcia, *Inorganica Chimica Acta*, 2021, **516**.
